# Supplementary material for: Bmal1 in the striatum influences alcohol intake in a sexually dimorphic manner
Source: PubMed Central journal article supplement (PMC8548330; doi:10.1038/s42003-021-02715-9), 2021-10-26
Supplement: 42003_2021_2715_MOESM2_ESM.pdf [file 42003_2021_2715_MOESM2_ESM.pdf]

1 ***Bmal1* in the striatum influences alcohol intake in a sexually dimorphic manner**

2

3

4 Nuria de Zavalía\*, Konrad Schoettner, Jory A. Goldsmith, Pavel Solis, Sarah Ferraro, Gabrielle

5 Parent, and Shimon Amir\*

7 Center for Studies in Behavioral Neurobiology

8 Department of Psychology

9 Concordia University

10 Montreal

11 Canada

12 \* Correspondence: [shimon.amir@concordia.ca](mailto:shimon.amir@concordia.ca), [nuria.dezavalia@concordia.ca](mailto:nuria.dezavalia@concordia.ca)

13

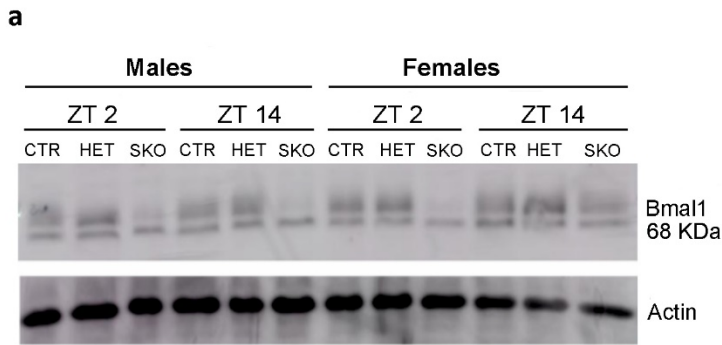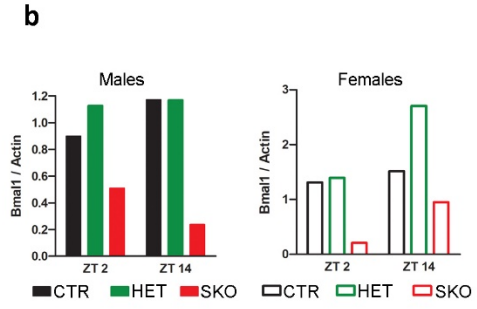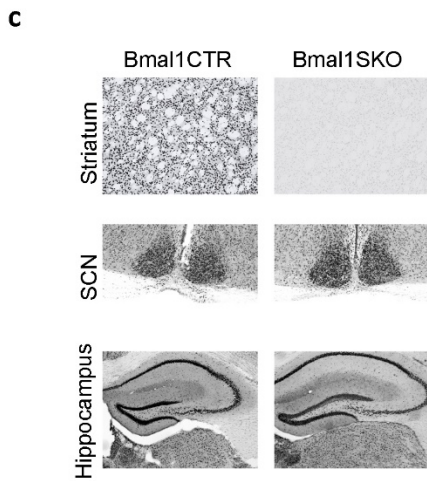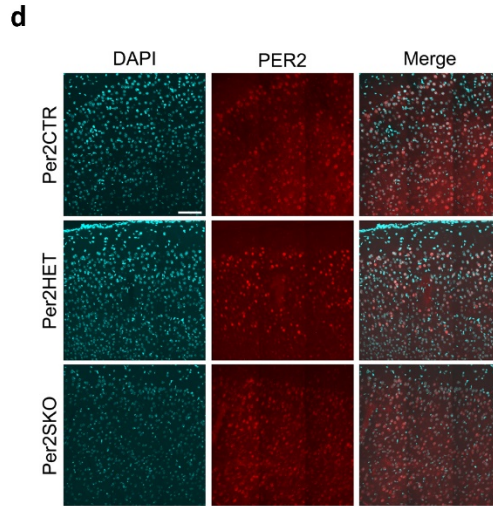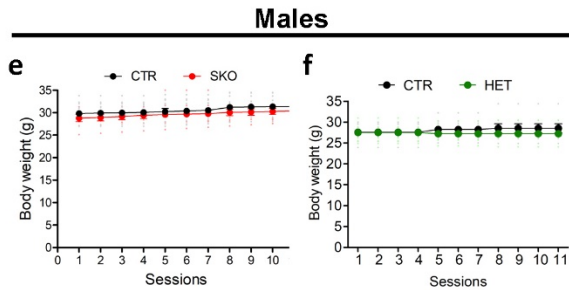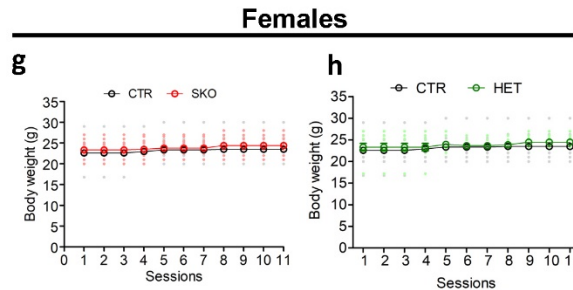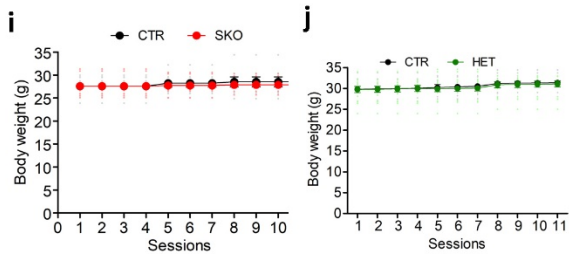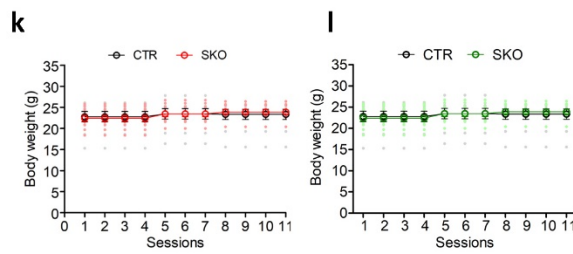

**Bmal1**

**Per2**

14 **Supplementary Figure 1: *Bmal1* expression in the mouse striatum and body weight of *Bmal1***  
15 **and *Per2* knockout mice.**

16 **a**, Qualitative western blot analysis of BMAL1 in the dorsal striatum of control and *Bmal1* knockout male  
17 and female mice at two different times of the day. **b**, Quantitation of the blot intensity is shown. **c**, a  
18 representative image of BMAL1 immunohistochemistry staining in the striatum, hippocampus and SCN of  
19 control and *Bmal1* knockout. **d**, a representative image of PER2 immunofluorescence staining in the cortex  
20 of control, *Per2* heterozygote and knockout mice. PER2: red, DAPI: cyan. Scale bar = 100  $\mu$ m. **e**, daily body  
21 weight of control and *Bmal1* knockout male mice. Two-way repeated measure ANOVA (RM-ANOVA), no  
22 significant effect,  $F(1, 23) = 0.9306$ ,  $p = 0.3448$ . **f**, daily body weight of control and *Bmal1* heterozygote  
23 male mice. RM-ANOVA, no significant effect,  $F(1, 26) = 0.05852$ ,  $p = 0.8108$ . **g**, daily body weight of control  
24 and *Bmal1* knockout female mice. RM-ANOVA, no significant effect,  $F(1, 29) = 0.8145$ ,  $p = 0.3742$ . **h**, daily  
25 body weight of control and *Bmal1* heterozygote female mice. RM-ANOVA, no significant effect,  $F(1, 25) =$   
26  $0.6254$ ,  $p = 0.4365$ . **i**, daily body weight of control and *Per2* knockout male mice. RM-ANOVA, no significant  
27 effect,  $F(1, 14) = 0.9905$ ,  $p = 0.7576$ . **j**, daily body weight of control and *Per2* heterozygote male mice. RM-  
28 ANOVA, no significant effect,  $F(1, 13) = 0.4200$ ,  $p = 0.5282$ . **k**, daily body weight of control and *Per2*  
29 knockout female mice. RM-ANOVA, no significant effect,  $F(1, 17) = 0.02185$ ,  $p = 0.9633$ . **l**, daily body weight  
30 of control and *Per2* heterozygote female mice. RM-ANOVA, no significant effect,  $F(1, 13) = 0.2798$ ,  $p =$   
31  $0.6058$ . ZT: Zeitgeber time. **e-l**, the values express mean  $\pm$  S.E.M. **a-d**,  $n = 3$ /genotype. **e-h**, CTR: control, HET:  
32 *Bmal1* heterozygote, SKO: *Bmal1* knockout. **e, f**, CTR  $n = 12$ , HET  $n = 16$ , SKO  $n = 13$ . **g, h**, CTR  $n = 17$ , HET  $n = 10$ ,  
33 SKO  $n = 14$ . **i-l**, CTR: control, HET: *Per2* heterozygote, SKO: *Per2* knockout. **i, j**, CTR  $n = 8$ , HET  $n = 7$ , SKO  $n = 8$ . **k, l**,  
34 CTR  $n = 9$ , HET  $n = 6$ , SKO  $n = 10$ .

## Bmal1

a

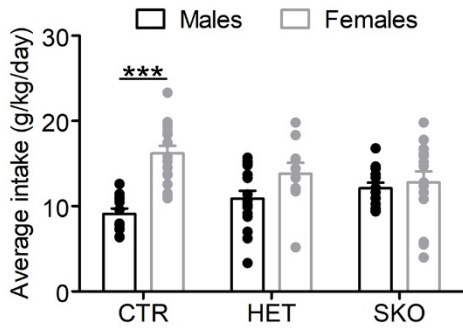

b

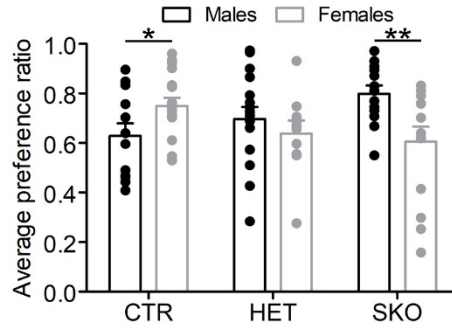

## Per2

c

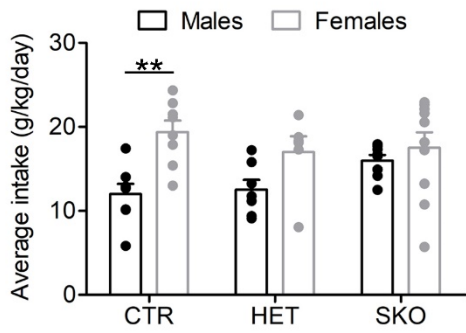

d

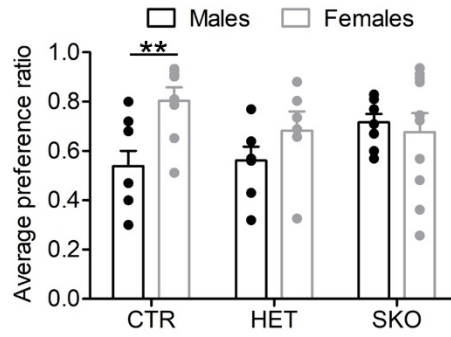

**94** **Supplementary Figure 2: Deletion of *Bmal1* eliminates sex differences in alcohol drinking behavior.**

95 **a**, average alcohol intake of male vs. female *Bmal1* control, heterozygote and knockout mice.

96 Unpaired two-tailed t-test, CTR male vs female \*\*\*  $p < 0.0001$ , HET male vs female, NS,  $p = 0.06$ ,

97 SKO male vs female, NS,  $p = 0.65$ . **b**, average alcohol preference of male vs. female *Bmal1*

98 control, heterozygote and knockout mice. Unpaired two-tailed t-test, CTR male vs female \*  $p <$

99  $0.05$ , HET male vs female, NS,  $p = 0.36$ , SKO male vs female, \*\*  $p < 0.01$ . **c**, average alcohol intake

100 of male vs. female *Per2* control, heterozygote and knockout mice. Unpaired two-tailed t-test,

101 CTR male vs female \*\*  $p < 0.01$ , HET male vs female, NS,  $p = 0.06$ , SKO male vs female, NS,  $p =$

102  $0.49$ . **d**, average alcohol preference of male vs. female *Per2* control, heterozygote and knockout

103 mice. Unpaired two-tailed t-test, CTR male vs female \*\*  $p < 0.01$ , HET male vs female, NS,  $p =$

104  $0.22$ , SKO male vs female, NS,  $p = 0.67$ .

105 NS = no significant differences. The value express mean  $\pm$  S.E.M. **a, c**, CTR: *Bmal1* control, HET:

106 *Bmal1* heterozygote, SKO: *Bmal1* Knockout. Males: CTR  $n = 12$ , HET  $n = 16$ , SKO  $n = 13$ . Females:

107 CTR  $n = 17$ , HET  $n = 10$ , SKO  $n = 14$ . **b,-d**, CTR: *Per2* control, HET: *Per2* heterozygote, 2SKO: *Per2*

108 Knockout. Males: CTR  $n = 8$ , HET  $n = 7$  SKO  $n = 8$ . Females: CTR  $n = 9$ , HET  $n = 6$ , SKO  $n = 10$ .

109

110

111

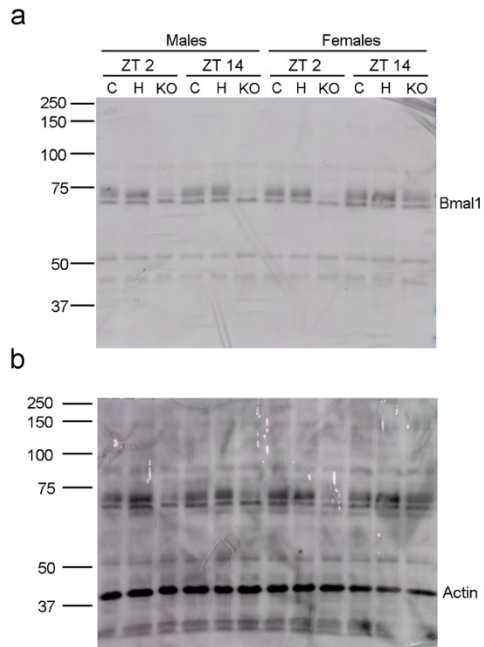

112

113

**114** Supplementary Figure 3: Non-cropped Western blot gel from Supplementary Figure 1a.

115 **a**, Non-cropped anti-Bmal1 immunoblotting for BMAL1 in Supplementary Figure 1a. **b**, anti-Actin

116 immunoblotting for ACTIN in Supplementary Figure 1a.
