# Supplementary material for: Bmal1 in the striatum influences alcohol intake in a sexually dimorphic manner
Source: PubMed Central journal article supplement (PMC8548330; doi:10.1038/s42003-021-02715-9), 2021-10-26
Supplement: 42003_2021_2715_MOESM3_ESM.pdf [file 42003_2021_2715_MOESM3_ESM.pdf]

## Description of Additional Supplementary Files

**File name:** Supplementary Data 1.

**Description:** Voluntary alcohol consumption in *Bmal1* knockout mice.

**File name:** Supplementary Data 2.

**Description:** Voluntary alcohol consumption in *Per2* knockout mice.

**File name:** Supplementary Data 3.

**Description:** Voluntary alcohol consumption in *Bmal1* and *Per2* heterozygote mice.

**File name:** Supplementary Data 4.

**Description:** Sucrose consumption in *Bmal1* and *Per2* knockout mice.

**File name:** Supplementary Data 5.

**Description:** Circadian analysis of locomotor activity of *Bmal1* and *Per2* control, heterozygote and knockout male and female mice.

**File name:** Supplementary Data 6.

**Description:** Voluntary alcohol consumption in *Gpr88* heterozygote mice.
